# Supplementary material
Source: PubMed Central journal article supplement (PMC5053093)

# Appendix A

## Screen Shots of ezPARENT Program

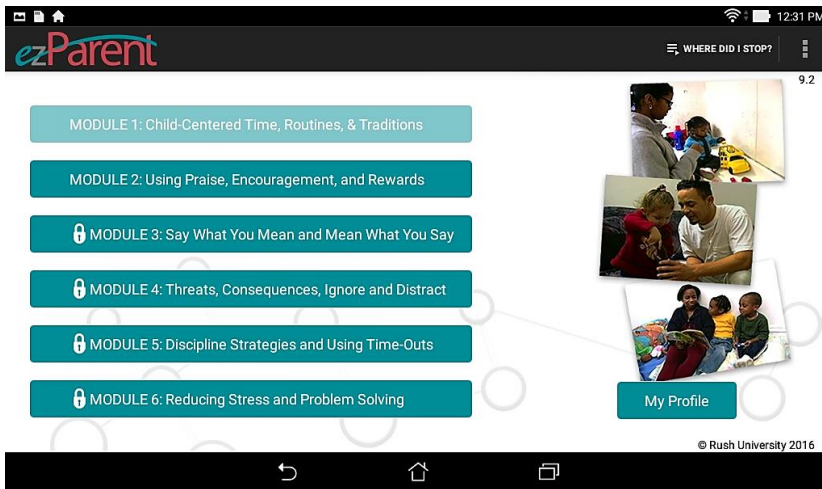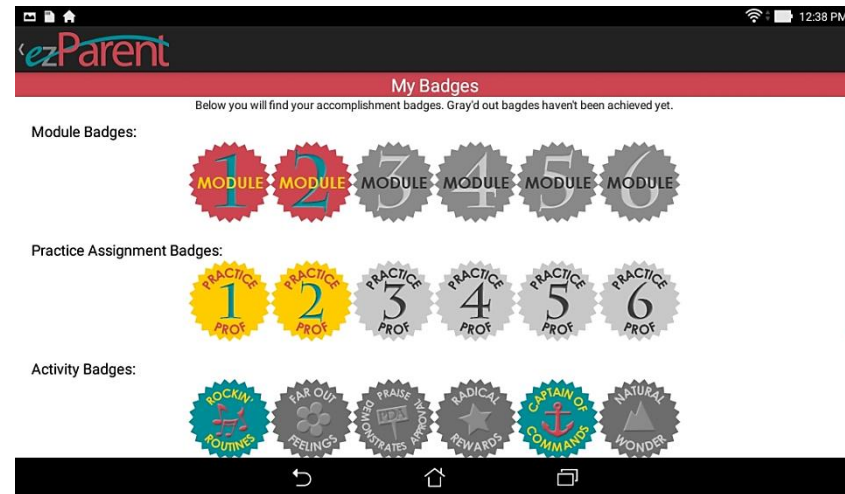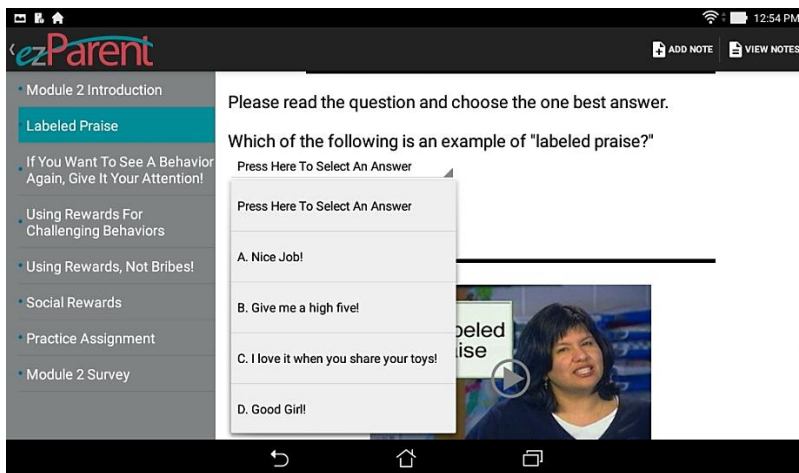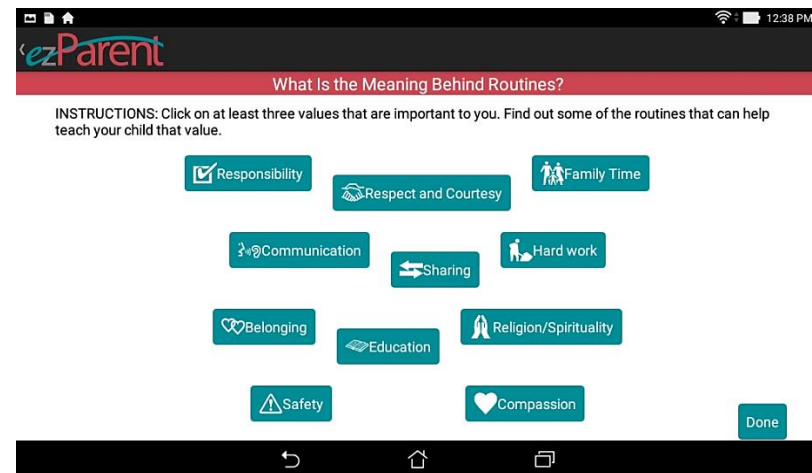

Supplement: NIHMS819851-supplement-Appendix_A.pdf [file NIHMS819851-supplement-Appendix_A.pdf]

# Appendix A

## Screen Shots of Health-e Kids Control application

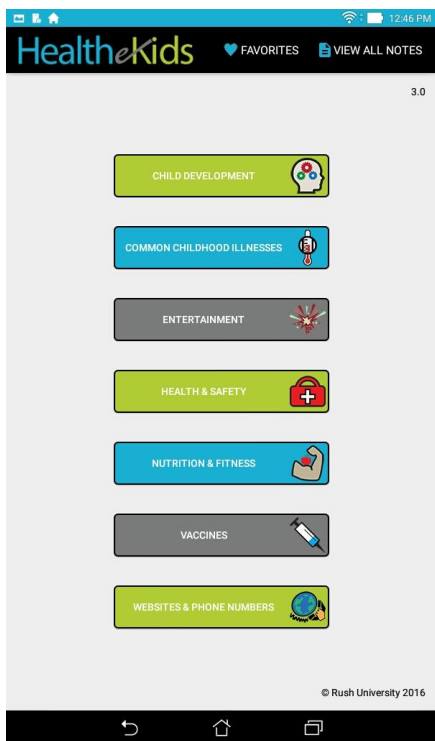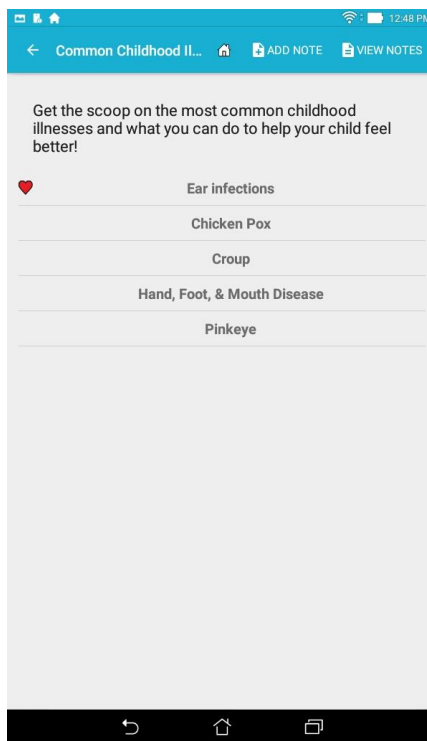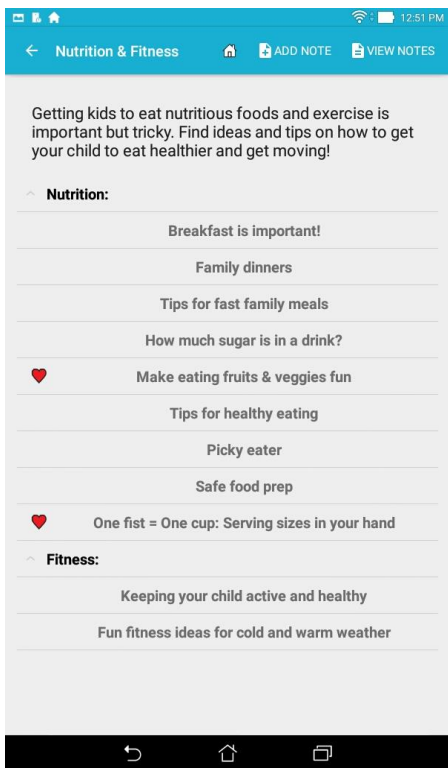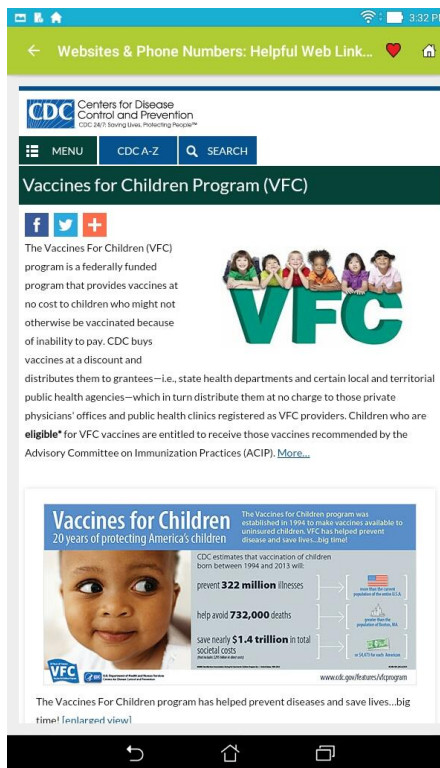

Supplement: NIHMS819851-supplement-Appendix_B.pdf [file NIHMS819851-supplement-Appendix_B.pdf]
